# Supplementary material for: BCG Moreau Vaccine Safety Profile and NK Cells—Double Protection Against Disseminated BCG Infection in Retrospective Study of BCG Vaccination in 52 Polish Children with Severe Combined Immunodeficiency
Source: Springer Nature journal article supplement (doi:10.1007/s10875-019-00709-1), 2019-11-20
Supplement: MOESM1 [file 17410130]

**Table S1. SCID diagnosis and BCG-associated complications in patients hospitalised at CMHI**

| SCID (n=52) | No manifestations | Localised | Disseminated | Disseminated  and Localised | Positive  PCR / culture | Death from BCG disseminated  infection |
| --- | --- | --- | --- | --- | --- | --- |
| SCID with NK- phenotype  n = 18 |  |  |  |  |  |  |
| IL2RG(n= 8) | 2 (25%) | 0(0%) | 3(38%) | 3(38%) | 6/4 |  |
| RAG1(n=1) | 1(100%) | 0(0%) | 0(0%) | 0(0%) |  |  |
| ADA (n=1) | 1(100%) | 0(0%) | 0(0%) | 0(0%) |  |  |
| JAK3 (n=1 | 0(0%) | 0(0%) | 0(0%) | 1(100%) | 1/1 |  |
| MHC II (n=1) | 1(100%) | 0(0%) | 0(0%) | 0(0%) |  |  |
| Unknown mutation  (n= 6) | 3(50%) | 0(0%) | 2(33%) | 1(17%) | 1/0 | 3* |
| SCID with NK+ phenotype  n = 34 |  |  |  |  |  |  |
| RAG1/RAG2 (n=16) | 12(75%) | 4(25%) | 0(0%) | 0(0%) |  |  |
| IL2RG (n=2) | 1(50%) | 1(50%) | 0(0%) | 0(0%) |  |  |
| Artemis (n=2) | 1(50%) | 1(50%) | 0(0%) | 0(0%) |  |  |
| Cernunnous (n=1) | 1(100%) | 0 (0%) | 0(0%) | 0(0%) |  |  |
| IL7RA (n=2) | 2(100%) | 0(0%) | 0(0%) | 0(0%) |  |  |
| Zap70 (n=1) | 1(100%) | 0(0%) | 0(0%) | 0(0%) |  |  |
| Unknown mutation  (n=10) | 9(90%) | 1(10%) | 0(0%) | 0(0%) |  |  |

 *All three infants admitted to the Intensive Care Unit before 1985 with multiple organ failure were diagnosed with SCID during hospitalisation; in one patient, BCG disseminated infection was confirmed by PCR and culture [20].

**Table S2. SCID patients with or without disseminated BCG infection hospitalised at CMHI**

| SCID = 52 | No manifestations | Localised and/or disseminated | *P* value |
| --- | --- | --- | --- |
| T cells/µL (25th-75th percentile) | 370 (48-1238) | 128.5 (17- 451)* | 0.0915 |
|  |  |  |  |
| B cells/µL (25th-75th percentile) | 205 (16-1200) | 1515 (1165-2515) | 0.0126 |
|  |  |  |  |
| NK cells/µL (25th-75th percentile) | 305 (163-618) | 45 (18-47) | 0.0161 |

*A patient with maternal T-cells engraftment (T-cells: 10260 µL) was excluded from statistical analysis

**Table S3. Number of NK cells in 52 SCID patients vaccinated with BCG-vaccine hospitalised at CMHI**

| SCID (n=52) | NK cells µL  (normal range >200 µL) | Localised | Disseminated |
| --- | --- | --- | --- |
| NK - SCID (n=18) | 45 (19-68) | 5 (42%) | 10 (100%) |
|  |  |  |  |
| NK + SCID (n=34) | 458 (295-1181) | 7 (58%) | 0 (0%) |
|  |  |  |  |
| *P value* | p<0.000001 | p=0.4859 | p<0.000001 |
|  |  | (n=50) |  |
